# Supplementary material for: Avoidable deaths in Sweden, 1997–2018: temporal trend and the contribution to the gender gap in life expectancy
Source: PubMed Central journal article supplement (PMC7968161; doi:10.1186/s12889-021-10567-5), 2021-03-17
Supplement: 12889_2021_10567_MOESM1_ESM.pdf [file 12889_2021_10567_MOESM1_ESM.pdf]

List of avoidable causes of death according to the UK Office of National Statistics

| Category                                           | Cause                                                                                              | ICD-10 codes                              | Age limit |
|----------------------------------------------------|----------------------------------------------------------------------------------------------------|-------------------------------------------|-----------|
| <b>Amenable to healthcare</b>                      | Selected invasive bacterial and protozoal infections                                               | A38-A41, A46, B50-B54, G00, G03, J02, L03 | 0-74      |
|                                                    | Intestinal infections                                                                              | A00-A09                                   | 0-14      |
|                                                    | Malignant neoplasm of unspecified parts of uterus and body of uterus                               | C54-C55                                   | 0-44      |
|                                                    | Malignant neoplasm of testis                                                                       | C62                                       | 0-74      |
|                                                    | Malignant neoplasm of bladder                                                                      | C67                                       | 0-74      |
|                                                    | Malignant neoplasm of thyroid gland                                                                | C73                                       | 0-74      |
|                                                    | Hodgkin's disease                                                                                  | C81                                       | 0-74      |
|                                                    | Leukaemia                                                                                          | C91                                       | 0-44      |
|                                                    | Benign neoplasms                                                                                   | D10-D36                                   | 0-74      |
|                                                    | Diseases of the Thyroid                                                                            | E00-E07                                   | 0-74      |
|                                                    | Epilepsy and status epilepticus                                                                    | G40-G41                                   | 0-74      |
|                                                    | Rheumatic and other valvular heart disease                                                         | I01-I09                                   | 0-74      |
|                                                    | Hypertensive diseases                                                                              | I10-I15                                   | 0-74      |
|                                                    | Cerebrovascular diseases                                                                           | I60-I69                                   | 0-74      |
|                                                    | Pneumonia                                                                                          | J12-J18                                   | 0-74      |
|                                                    | Asthma                                                                                             | J45-J46                                   | 0-74      |
|                                                    | Selected respiratory diseases                                                                      | J00-J01, J03-J06, J20-J22, J30-J39        | 0-14      |
|                                                    | Gastric and duodenal ulcer                                                                         | K25-K28                                   | 0-74      |
|                                                    | Acute abdomen, appendicitis, intestinal obstruction, cholecystitis/lithiasis, pancreatitis, hernia | K35-K38, K40-K46, K80-K83, K85-K86        | 0-74      |
|                                                    | Nephritis and nephrosis                                                                            | N00-N07, N17-N19, N25-N27                 | 0-74      |
| Obstructive uropathy and prostatic hyperplasia     | N13, N20-N21, N35, N40                                                                             | 0-74                                      |           |
| Complications of perinatal period                  | P00-P96, A33                                                                                       | All                                       |           |
| Congenital malformations of the circulatory system | Q20-Q28                                                                                            | 0-74                                      |           |
| <b>Preventable</b>                                 | Rubella                                                                                            | B06                                       | 0-14      |
|                                                    | Malignant neoplasm of lip, oral cavity and pharynx                                                 | C00-C14                                   | 0-74      |
|                                                    | Malignant neoplasm of oesophagus                                                                   | C15                                       | 0-74      |
|                                                    | Malignant neoplasm of stomach                                                                      | C16                                       | 0-74      |
|                                                    | Malignant neoplasm of liver                                                                        | C22                                       | 0-74      |
|                                                    | Malignant neoplasm of trachea, bronchus and lung                                                   | C33-C34                                   | 0-74      |
|                                                    | Mesothelioma                                                                                       | C45                                       | 0-74      |
|                                                    | Alcohol related diseases, excluding external causes                                                | F10, K70, K73, K74                        | 0-74      |
|                                                    | Illicit drug use disorders                                                                         | F11-F16, F18-F19                          | 0-74      |
|                                                    | DVT with pulmonary embolism                                                                        | I26, I80                                  | 0-74      |
|                                                    | Aortic aneurysm and dissection                                                                     | I71                                       | 0-74      |
|                                                    | Spina Bifida                                                                                       | Q05                                       | 0-74      |
|                                                    | Transport accidents                                                                                | V01-V99                                   | All       |
|                                                    | Accidental injury                                                                                  | W00-X59                                   | All       |
| Suicide and self-inflicted injuries                | X60-X84, Y10-Y34                                                                                   | All                                       |           |
| Homicide/Assault                                   | X85-Y09                                                                                            | All                                       |           |
| <b>Amenable &amp; preventable</b>                  | Tuberculosis                                                                                       | A15-A19, B90                              | 0-74      |
|                                                    | Pertussis (whooping cough)                                                                         | A37                                       | 0-14      |
|                                                    | Measles                                                                                            | B05                                       | 0-14      |
|                                                    | Other infections (Diphtheria, Tetanus, Poliomyelitis and Varicella)                                | A35, A36, A80, B01                        | 0-19      |
|                                                    | HIV/AIDS                                                                                           | B20-B24                                   | All       |
|                                                    | Malignant neoplasm of colon and rectum                                                             | C18-C21                                   | 0-74      |
|                                                    | Malignant melanoma of skin                                                                         | C43                                       | 0-74      |
|                                                    | Malignant neoplasm of breast                                                                       | C50                                       | 0-74      |
|                                                    | Malignant neoplasm of cervix uteri                                                                 | C53                                       | 0-74      |
|                                                    | Diabetes mellitus                                                                                  | E10-E14                                   | 0-74      |
|                                                    | Influenza (including swine flu)                                                                    | J09-J11                                   | 0-74      |
|                                                    | Chronic obstructive pulmonary disorder                                                             | J40-J44                                   | 0-74      |
|                                                    | Misadventures to patients during surgical and medical care                                         | Y60-Y69, Y83-Y84                          | All       |
| <b>Avoidable ischaemic heart disease</b>           | Ischaemic heart disease                                                                            | I20-I25                                   | 0-74      |
