# Supplementary material for: Avoidable deaths in Sweden, 1997–2018: temporal trend and the contribution to the gender gap in life expectancy
Source: PubMed Central journal article supplement (PMC7968161; doi:10.1186/s12889-021-10567-5), 2021-03-17
Supplement: 12889_2021_10567_MOESM7_ESM.pdf [file 12889_2021_10567_MOESM7_ESM.pdf]

Additional file 7. Observed age-standardized mortality rates (per 100,000 persons) for years 1997, 2010, and 2018 in Sweden, by sex.

| Causes (ICD-10 codes)                                                                | Men   |       |       | Women |       |       |
|--------------------------------------------------------------------------------------|-------|-------|-------|-------|-------|-------|
|                                                                                      | 1997  | 2010  | 2018  | 1997  | 2010  | 2018  |
| Amenable neoplasms (C54-C55, C62, C67, C73, C81, C91, D10-D36)                       | 5.3   | 4.2   | 2.7   | 2.3   | 1.8   | 1.5   |
| Hypertensive diseases (I10-I15)                                                      | 2.0   | 2.3   | 2.4   | 0.9   | 1.3   | 1.2   |
| Cerebrovascular diseases (I60-I69)                                                   | 26.2  | 13.4  | 10.5  | 15.7  | 8.1   | 6.5   |
| Pneumonia (J12-J18)                                                                  | 4.3   | 2.9   | 2.9   | 2.6   | 1.2   | 1.3   |
| <i>Total amenable</i>                                                                | 50.9  | 33.1  | 27.3  | 29.7  | 19.4  | 16.8  |
| Preventable neoplasms (C00-C14, C15, C16, C22, C33-C34, C45)                         | 44.2  | 34.0  | 27.8  | 22.9  | 24.0  | 21.0  |
| Alcohol related and illicit drug use diseases (F10, K70, K73, K74, F11-F16, F18-F19) | 16.3  | 10.6  | 9.2   | 4.1   | 3.1   | 3.8   |
| Transport accidents (V01-V99)                                                        | 10.4  | 4.7   | 5.4   | 3.3   | 1.6   | 1.6   |
| Accidental injury (W00-X59)                                                          | 27.1  | 30.8  | 32.3  | 13.9  | 15.2  | 16.5  |
| Suicide and self-inflicted injuries (X60-X84, Y10-Y34)                               | 25.2  | 21.5  | 20.7  | 9.5   | 8.4   | 9.5   |
| <i>Total preventable</i>                                                             | 136.2 | 109.1 | 102.1 | 60.0  | 55.5  | 55.7  |
| Amenable & preventable neoplasms (C18-C21, C43, C50, C53)                            | 15.9  | 15.2  | 12.7  | 32.6  | 26.7  | 22.5  |
| Chronic obstructive pulmonary disorder (J40-J44)                                     | 8.3   | 5.8   | 5.4   | 6.4   | 6.9   | 7.2   |
| <i>Total amenable &amp; preventable</i>                                              | 35.0  | 29.1  | 25.9  | 43.9  | 37.4  | 34.4  |
| <i>Ischaemic heart disease (I20-I25)</i>                                             | 103.1 | 46.1  | 33.4  | 31.6  | 15.5  | 11.6  |
| <b>Total avoidable</b>                                                               | 325.3 | 217.4 | 188.7 | 165.2 | 127.8 | 118.5 |
| <b>Non-avoidable</b>                                                                 | 813.3 | 686.0 | 618.0 | 567.6 | 513.7 | 485.0 |
